# Supplementary material for: Integrated T cell cytometry metrics for immune-monitoring applications in immunotherapy clinical trials
Source: PubMed Central journal article supplement (PMC9675468; doi:10.1172/jci.insight.160398), 2022-10-10
Supplement: jciinsight-7-160398-s228.pdf [file jciinsight-7-160398-s228.pdf]

PD1

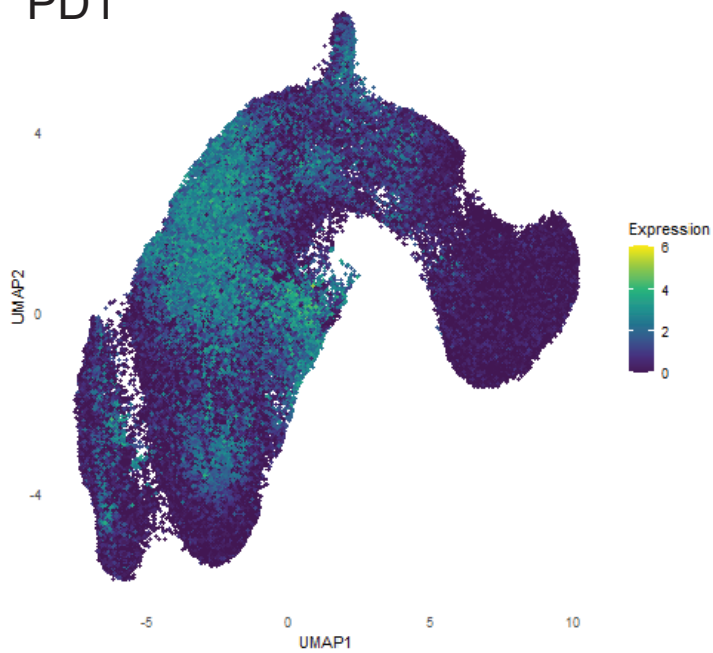

HELIOS

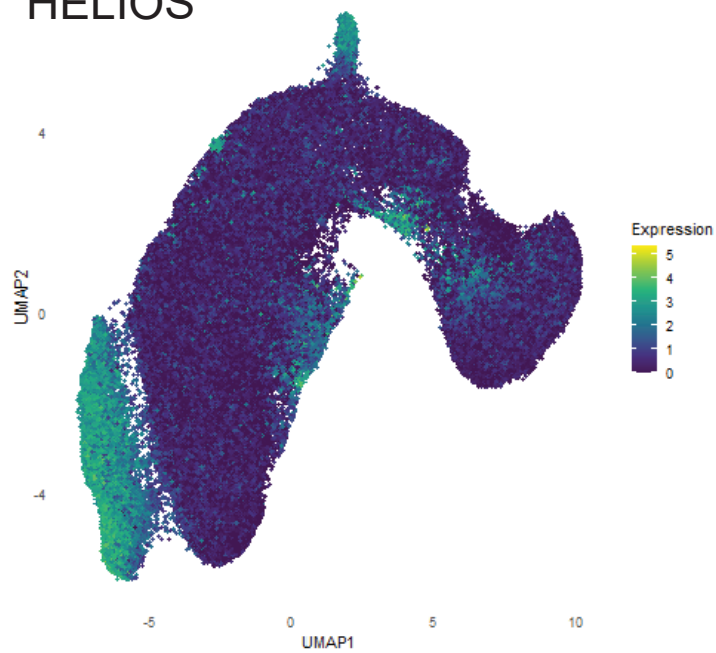

CD28

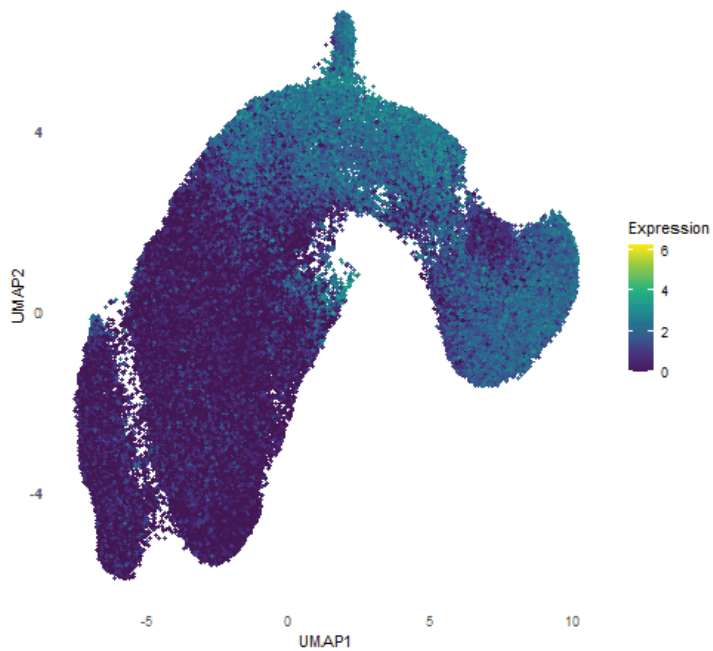

TOX

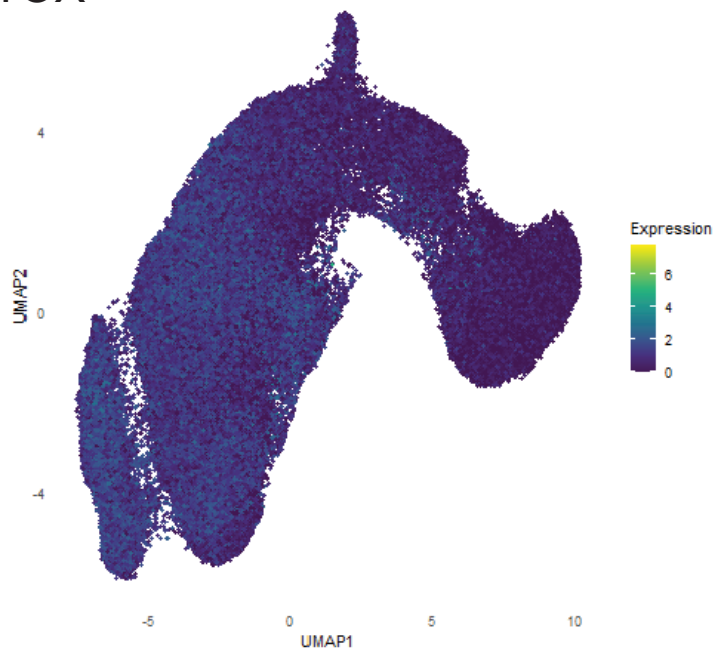

**Supplemental Figure 1. UMAP overlaid with expression of exhaustion markers PD-1, HELIOS, TOX and activation marker CD28.**

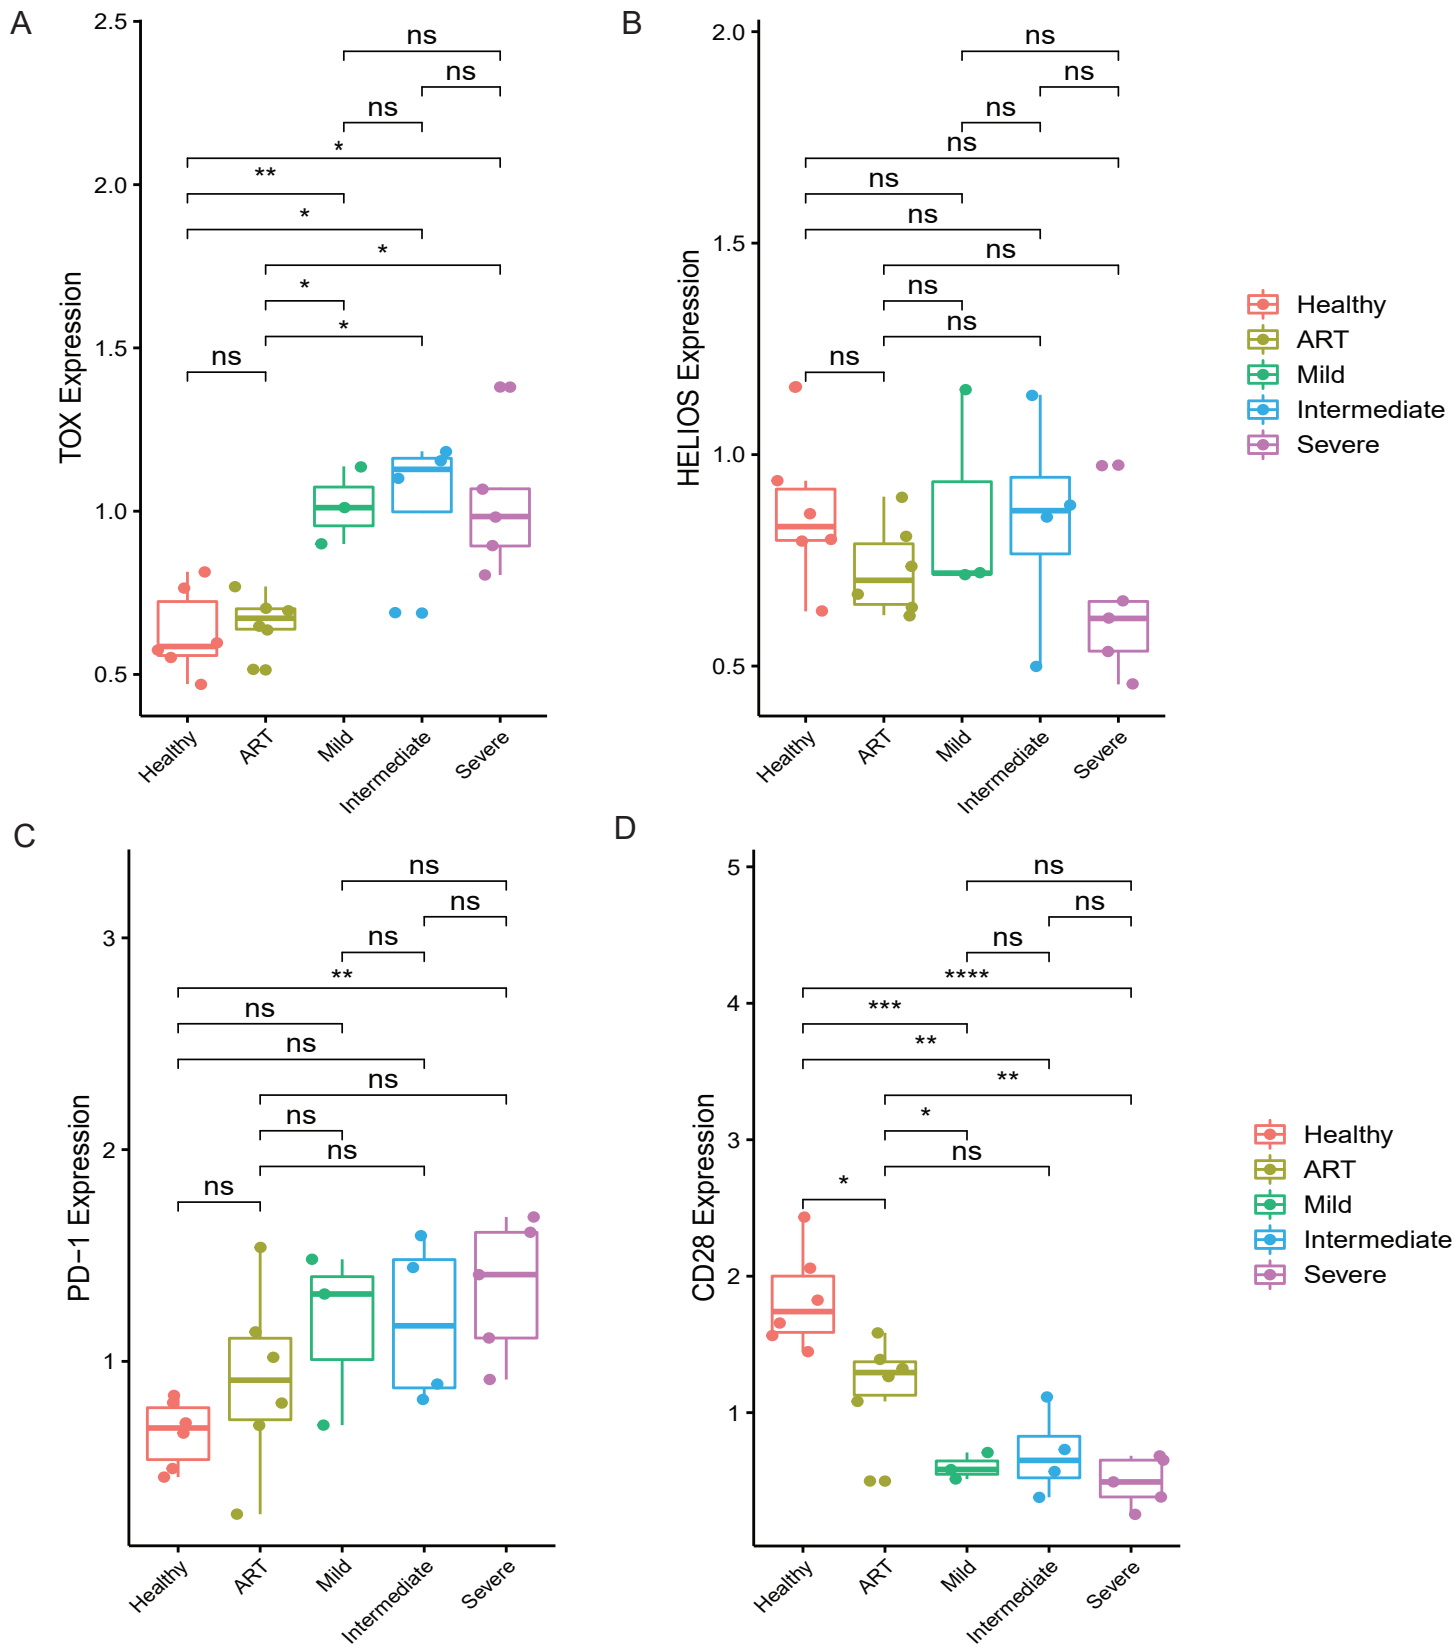

**Supplemental Figure 2. Comparison of single marker expression across patients.** Exhaustion markers TOX (A), HELIOS (B), PD-1 (C), and activation marker CD28 (D) average expression by patient. Statistical significance was determined by group mean comparison t-tests. Statistically significant P values are shown as follows: \*  $P < 0.05$ ; \*\*  $P < 0.01$ ; \*\*\*  $P < 0.001$ .

A

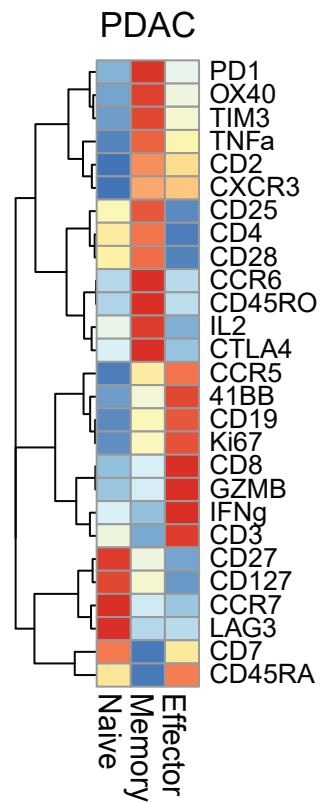

B

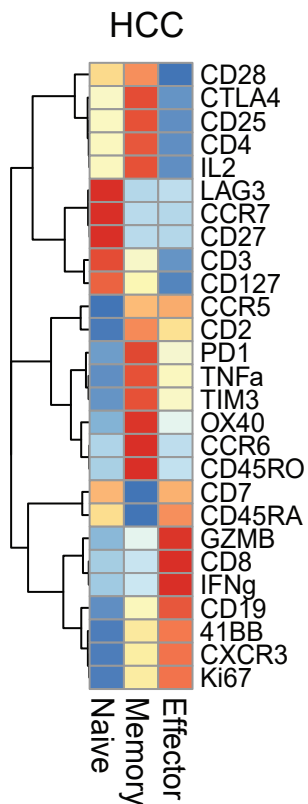

C

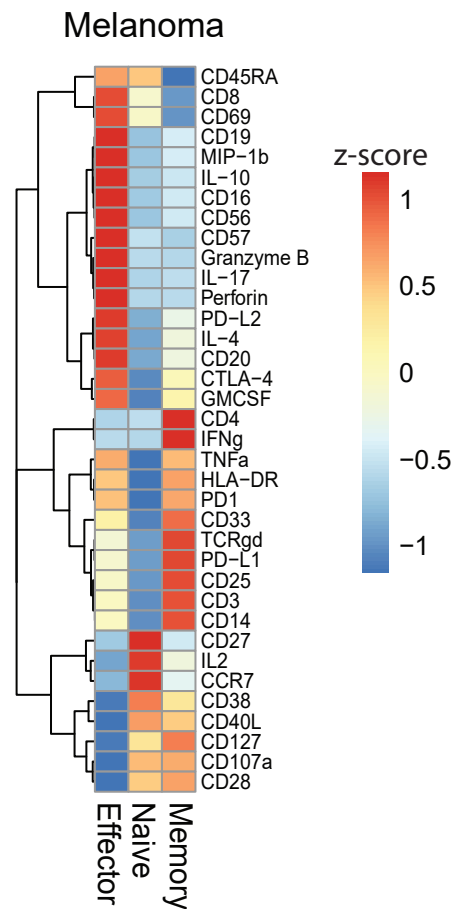

**Supplemental Figure 3. Comparison of learned T cell NMF patterns in PDAC (A), HCC (B) and Melanoma (C) CyTOF datasets.**

A

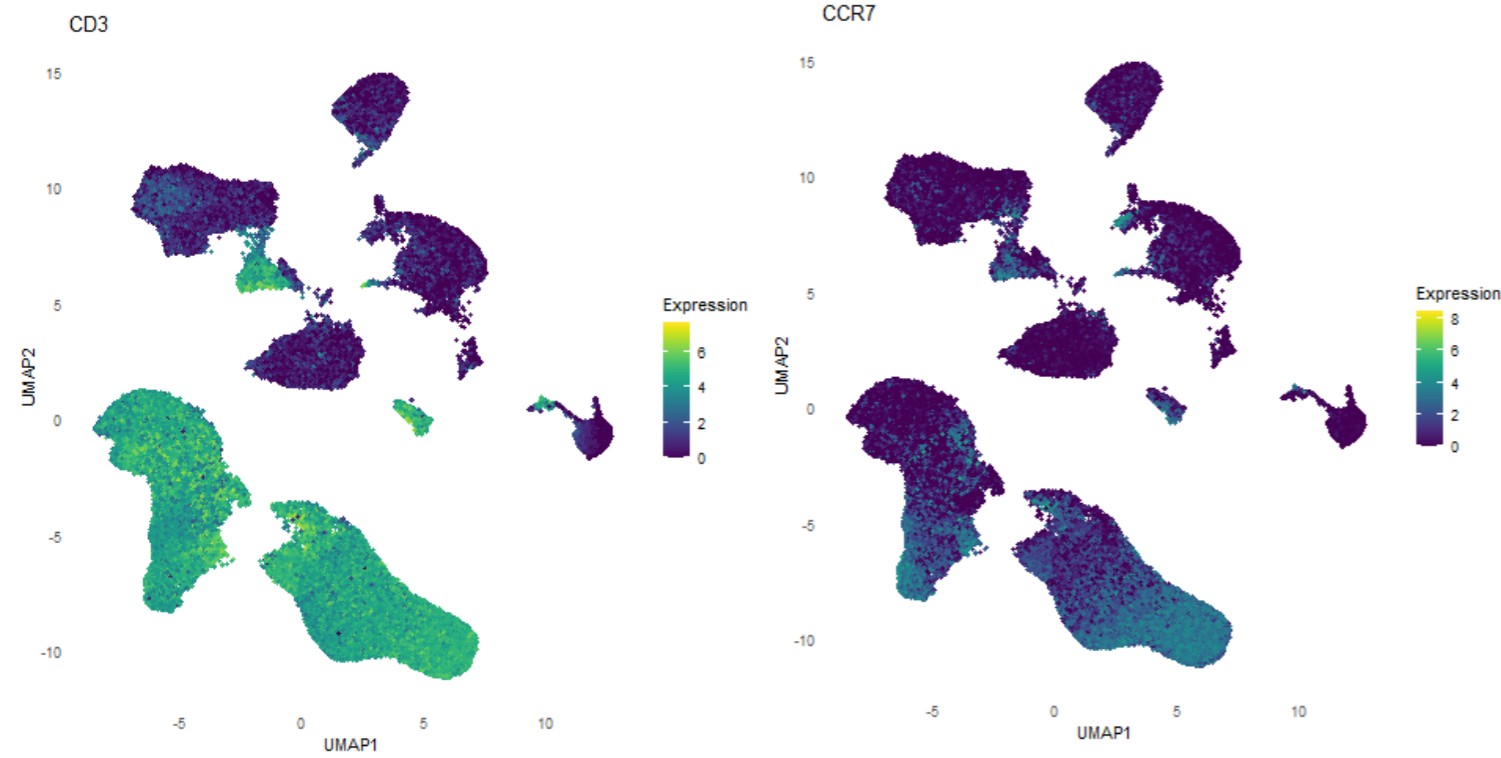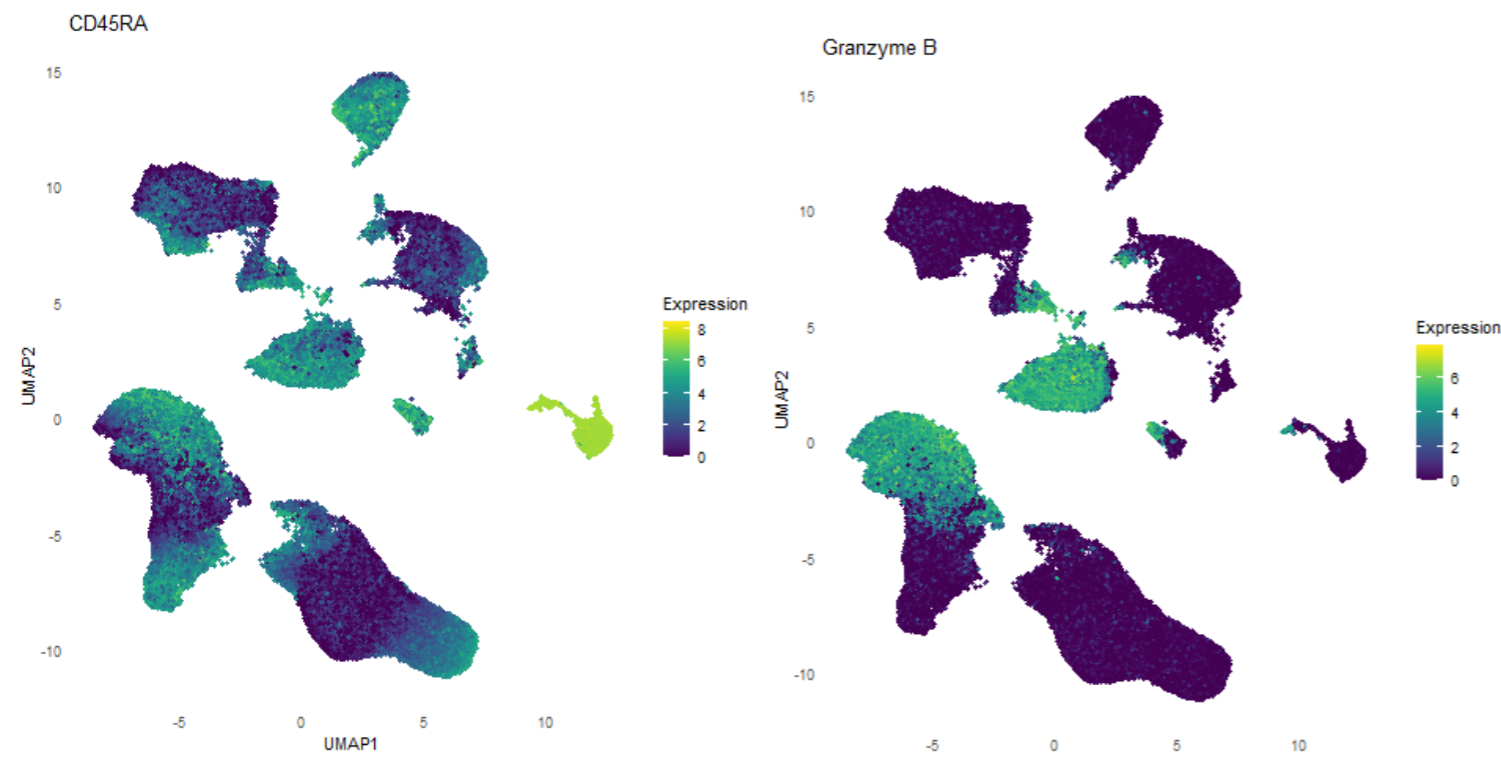

B

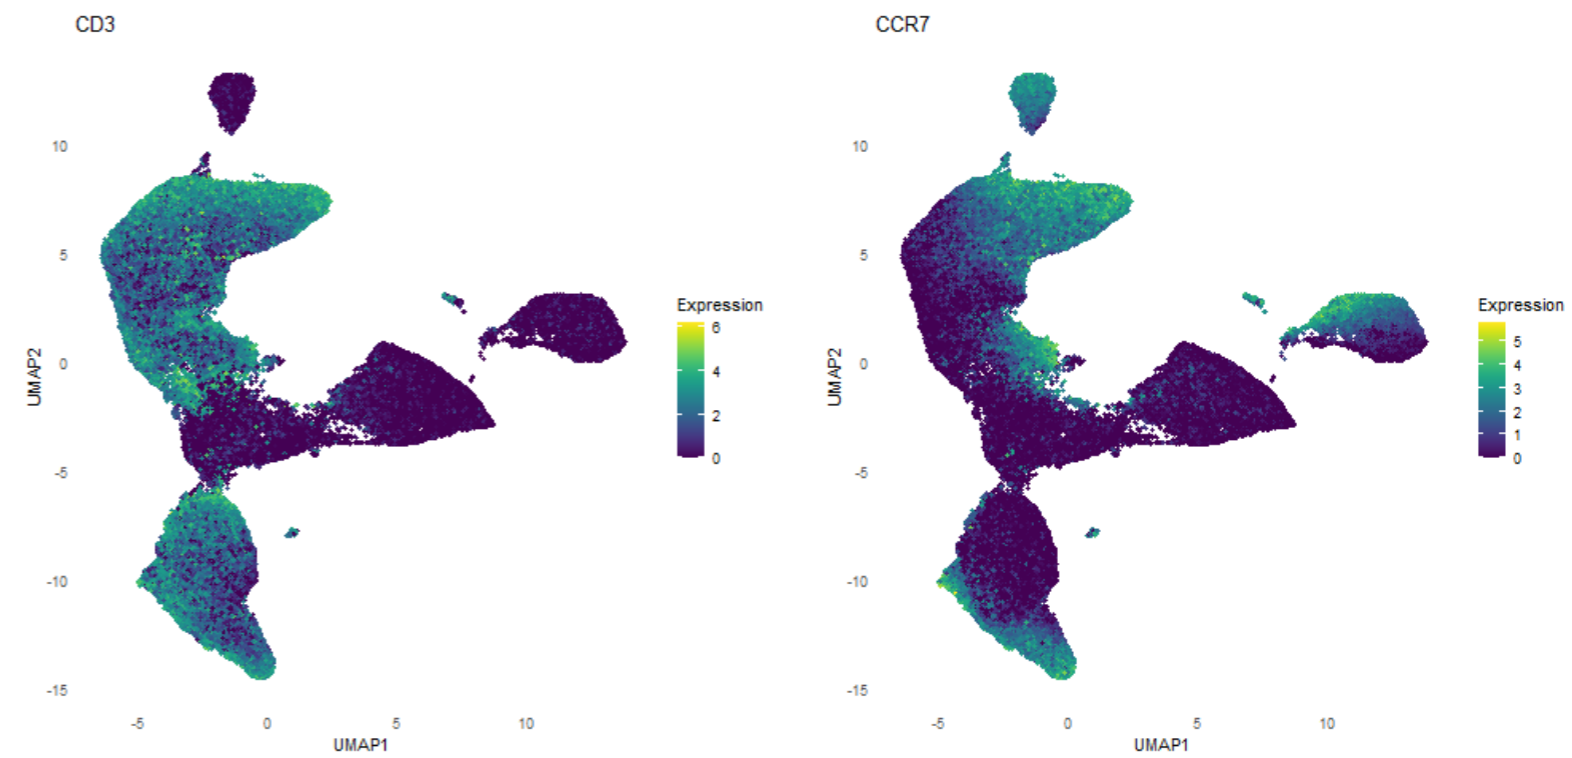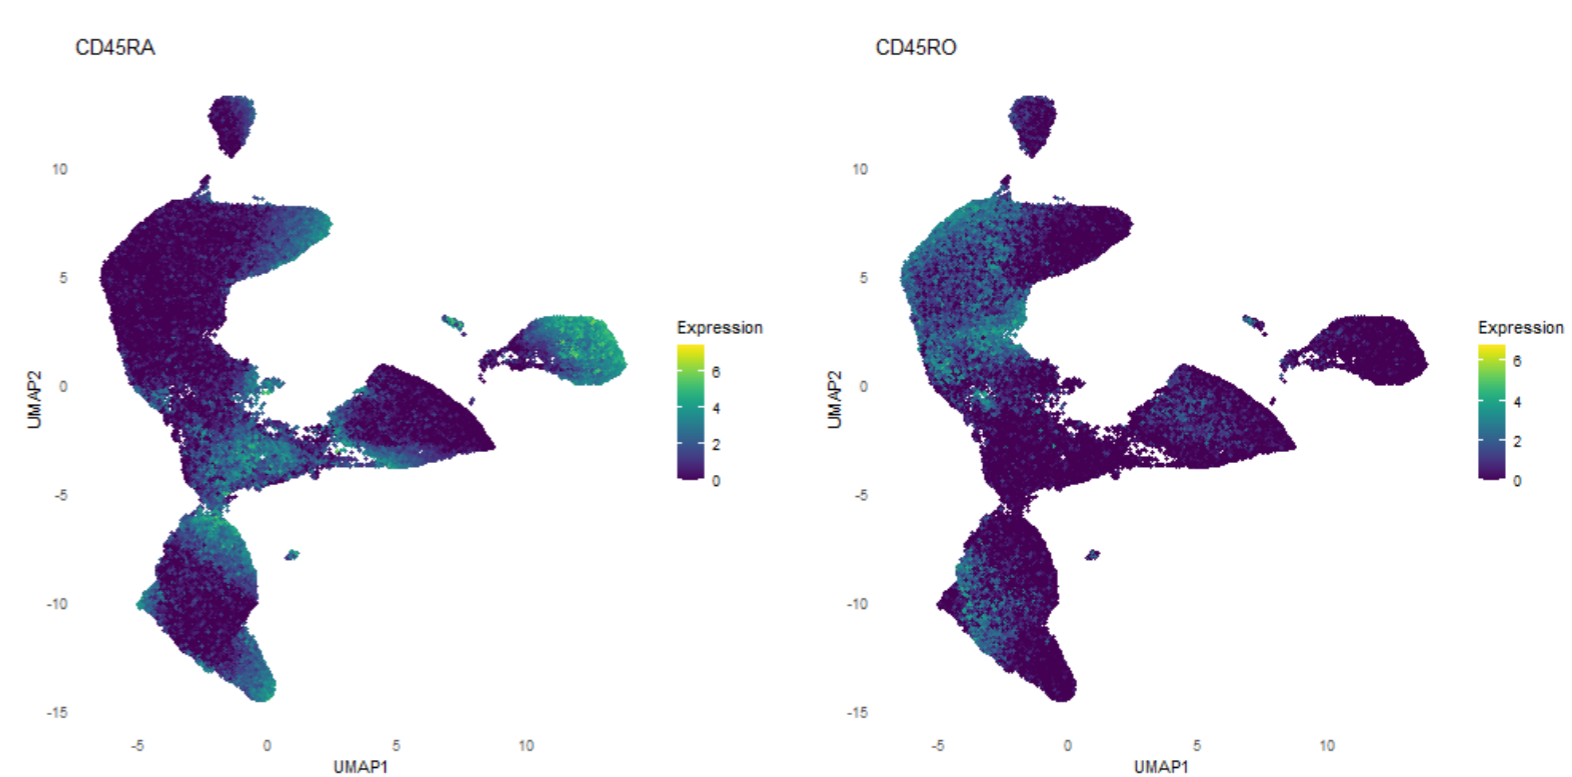

**Supplemental Figure 4. UMAPs overlaid with expression of representative markers in Melanoma Hodi dataset (A) and HCC dataset (B).**

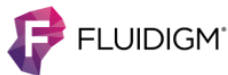

*Generate Raw CyTOF Data*

*Assess sample quality (Ir191, Beads, event length)*

*Randomization*

*CD45 channel debarcoding*

*Bead normalization and removal*

*Gating for live singlet cells*

*Aggregate patient protein expression matrices*

*Arcsine transformation & metadata incorporation*

*Downstream Machine Learning:  
Trajectory inference, CoGAPS, projectR*

**Supplemental Figure 5. Schematic of computational preprocessing and workflow.**
